# Supplementary material
Source: PubMed Central journal article supplement (PMC6340715)
Supplement: NIHMS1507726-supplement-Online_Only_Supplemental_Materials.pdf [file NIHMS1507726-supplement-Online_Only_Supplemental_Materials.pdf]

## **SUPPLEMENTAL MATERIAL:**

**Supplemental Methods:** Covariates included in the multivariable model

**Supplemental Table 1:** Baseline characteristics of patients included and excluded in the primary analysis

**Supplemental Table 2:** 30-day death and major bleeding by operator volume

**Supplemental Table 3:** Cumulative incidence of death and MACE over 1-year follow-up by subgroup

**Supplemental Table 4:** 1-year recurrent MI and unplanned revascularization by operator volume

**Supplemental Table 5:** Association between operator volume, analyzed continuously, and outcomes

**Supplemental Table 6:** Operator volume in 2014 by years of experience

## **Supplemental Appendix 1: Covariates included in multivariable models**

Age (>70 and ≤70 years); cardiogenic shock; prior heart failure; peripheral vascular disease; chronic lung disease; estimated glomerular filtration rate (calculated using the Modification of Diet in Renal Disease equation); New York Heart Association functional class; presentation with ST-segment elevation myocardial infarction (STEMI) (only for overall population); ethnicity; body mass index (≤30 and >30 kg/m<sup>2</sup>); diabetes; dyslipidemia; hypertension; cerebrovascular disease; current/recent smoker; prior coronary artery bypass grafting; prior myocardial infarction; prior percutaneous coronary intervention (PCI); cardiomyopathy or left ventricular systolic dysfunction; pre-PCI left ventricular ejection fraction; year of PCI; lesion length; multivessel disease; chronic total occlusion; bifurcation lesion; in-stent restenosis; at least one previously treated lesion within 1 month with in-stent thrombosis; lesion in graft; lesion complexity (high vs. non); Lesion location: left main/proximal left anterior descending coronary artery vs. mid/distal left anterior descending coronary artery vs. other; discharge P2Y<sub>12</sub> inhibitor; discharge aspirin; discharge beta blocker; discharge statin.

**Supplemental Table 1:** Baseline characteristics of patients included and excluded in the primary analysis

|                                 | Patients excluded<br>(n = 574,189) | Patients included<br>(n = 723,644) |
|---------------------------------|------------------------------------|------------------------------------|
| <b>Hospital characteristics</b> |                                    |                                    |
| Hospital region                 |                                    |                                    |
| Northeast                       | 102,338 (17.8%)                    | 104,044 (14.4%)                    |
| Midwest                         | 158,022 (27.5%)                    | 204,514 (28.3%)                    |
| South                           | 221,528 (38.6%)                    | 316,948 (43.8%)                    |
| West                            | 92,291 (16.1%)                     | 98,114 (13.6%)                     |
| Urban location                  | 331,615 (57.8%)                    | 395,016 (54.6%)                    |
| No. of beds                     | 404 (274, 587)                     | 393 (261, 576)                     |
| Annual PCI volume               | 685 (428, 1084)                    | 663 (406, 1083)                    |
| Teaching hospital*              | 280,808 (48.9%)                    | 333,131 (46.0%)                    |
| Private/community hospital      | 511,745 (89.1%)                    | 641,075 (88.6%)                    |
| <b>Patient characteristics</b>  |                                    |                                    |
| Age                             | 73 (68, 79)                        | 74 (69, 80)                        |
| Male                            | 367,130 (63.9%)                    | 448,322 (62.0%)                    |
| White                           | 510,502 (88.9%)                    | 662,486 (91.6%)                    |
| Admit source                    |                                    |                                    |
| Emergency dept                  | 205,099 (35.7%)                    | 251,165 (34.7%)                    |
| Transfer in                     | 82,398 (14.4%)                     | 129,335 (17.9%)                    |

|                                   | Patients excluded<br>(n = 574,189) | Patients included<br>(n = 723,644) |
|-----------------------------------|------------------------------------|------------------------------------|
| Other                             | 286,091 (49.8%)                    | 342,418 (47.3%)                    |
| BMI                               | 28 (25, 32)                        | 29 (25, 32)                        |
| GFR                               | 68 (53,86)                         | 67 (52, 85)                        |
| Prior MI                          | 205,866 (35.9%)                    | 196,693 (27.2%)                    |
| Prior CHF                         | 95,661 (16.7%)                     | 111,603 (15.4%)                    |
| HF within 2 weeks                 | 71,962 (12.5%)                     | 97,340 (13.5%)                     |
| LV systolic dysfunction           | 73,956 (12.9%)                     | 90,579 (12.5%)                     |
| Cardiogenic shock within 24 hours | 14,883 (2.6%)                      | 21,785 (3.0%)                      |
| Cardiac arrest within 24 hours    | 8,388 (1.5%)                       | 12,573 (1.7%)                      |
| Diabetes                          | 233,720 (40.7%)                    | 269,926 (37.3%)                    |
| Cerebrovascular disease           | 96,591 (16.8%)                     | 122,238 (16.9%)                    |
| Peripheral vascular disease       | 96,392 (16.8%)                     | 115,744 (16.0%)                    |
| Hypertension                      | 507,111 (88.3%)                    | 626,220 (86.5%)                    |
| Chronic lung disease              | 100,870 (17.6%)                    | 133,221 (18.4%)                    |
| Current/recent smoker             | 77,787 (13.6%)                     | 100,217 (13.9%)                    |
| Dyslipidemia                      | 485,785 (84.6%)                    | 583,235 (80.6%)                    |
| Prior PCI                         | 316,611 (55.1%)                    | 246,607 (34.1%)                    |
| Prior CABG                        | 145,769 (25.4%)                    | 163,621 (22.6%)                    |
| Admission symptoms                |                                    |                                    |
| No symptoms                       | 49,452 (8.6%)                      | 55,855 (7.7%)                      |

|                               | Patients excluded<br>(n = 574,189) | Patients included<br>(n = 723,644) |
|-------------------------------|------------------------------------|------------------------------------|
| Atypical chest pain           | 15,519 (2.7%)                      | 23,541 (3.3%)                      |
| Stable angina                 | 99,873 (17.4%)                     | 122,145 (16.9%)                    |
| Unstable angina               | 237,984 (41.5%)                    | 280,997 (38.8%)                    |
| NSTEMI                        | 107,109 (18.7%)                    | 146,333 (20.2%)                    |
| STEMI                         | 64,126 (11.2%)                     | 94,616 (13.1%)                     |
| PCI status                    |                                    |                                    |
| Elective                      | 268,669 (46.8%)                    | 321,495 (44.4%)                    |
| Urgent                        | 231,056 (40.2%)                    | 294,611 (40.7%)                    |
| Emergency                     | 72,615 (12.7%)                     | 104,729 (14.5%)                    |
| Salvage                       | 1,629 (0.3%)                       | 2,517 (0.4%)                       |
| Discharge Medications         |                                    |                                    |
| Aspirin                       | 537,463 (96.5%)                    | 671,417 (96.1%)                    |
| P2Y <sub>12</sub> inhibitor   | 541,518 (96.3%)                    | 674,862 (95.7%)                    |
| Statin                        | 494,365 (90.1%)                    | 609,710 (88.4%)                    |
| Beta blocker                  | 465,700 (85.2%)                    | 568,723 (83.0%)                    |
| <b>Lesion characteristics</b> |                                    |                                    |
| Lesion segment                |                                    |                                    |
| Left main                     | 18,702 (3.3%)                      | 23,045 (3.2%)                      |
| Proximal LAD                  | 94,300 (16.4%)                     | 126,496 (17.5%)                    |
| pRCA/mLAD/pLCx                | 215,680 (37.6%)                    | 276,985 (38.3%)                    |
| Other                         | 243,998 (42.5%)                    | 295,063 (40.8%)                    |

|                                    | Patients excluded<br>(n = 574,189) | Patients included<br>(n = 723,644) |
|------------------------------------|------------------------------------|------------------------------------|
| Previously treated lesion          | 89,297 (15.6%)                     | 58,792 (8.1%)                      |
| Vein graft lesion                  | 50,050 (8.7%)                      | 55,062 (7.6%)                      |
| Chronic total occlusion            | 15,614 (20.3%)                     | 17,545 (17.5%)                     |
| Bifurcation lesion                 | 64,755 (11.3%)                     | 80,112 (11.1%)                     |
| Lesion length                      | 16 (12, 23)                        | 16 (12, 23)                        |
| No. lesions attempted in lab visit |                                    |                                    |
| 1                                  | 417,783 (72.8%)                    | 527,321 (72.9%)                    |
| 2                                  | 124,050 (21.6%)                    | 155,520 (21.5%)                    |
| ≥ 3                                | 32,356 (5.6%)                      | 40,803 (5.6%)                      |
| Radial access                      | 73,825 (12.9%)                     | 87,714 (12.1%)                     |
| Unfractionated heparin             | 286,408 (50.0%)                    | 367,617 (50.9%)                    |
| Bivalirudin                        | 354,402 (61.8%)                    | 434,174 (60.0%)                    |
| Glycoprotein IIb/IIIa inhibitor    | 110,020 (19.2%)                    | 159,510 (22.1%)                    |
| Drug eluting stent                 | 422,819 (73.6%)                    | 509,776 (70.5%)                    |
| Fluoroscopy time (minutes)         | 12 (8, 20)                         | 12 (8, 19)                         |
| Contrast volume (mL)               | 175 (125, 230)                     | 180 (130, 235)                     |
| IVUS performed                     | 11,805 (21.0%)                     | 13,358 (20.8%)                     |

\*, residency/fellowship program; BMI, body mass index; GFR, glomerular filtration rate, calculated by the Modification of Diet in Renal Disease equation; MI, myocardial infarction; CHF, congestive heart failure; HF, heart failure; LV, left ventricular; PCI, percutaneous coronary intervention; CABG, coronary artery bypass graft surgery; NSTEMI, non-ST segment elevation myocardial infarction; STEMI, ST segment elevation myocardial infarction.

**Supplement Table 2: 30-day death and major bleeding by operator volume**

|                             | Unadjusted OR (95% CI) | Adjusted OR (95% CI) |
|-----------------------------|------------------------|----------------------|
| <b>Death</b>                |                        |                      |
| All patients                |                        |                      |
| High vs. low volume         | 0.92 (0.88-0.97)*      | 0.91 (0.86-0.96)*    |
| Intermediate vs. low volume | 1.00 (0.95-1.06)       | 0.95 (0.90-1.01)     |
| STEMI only                  |                        |                      |
| High vs. low volume         | 0.93 (0.87-0.99)*      | 0.86 (0.79-0.92)*    |
| Intermediate vs. low volume | 0.93 (0.87-1.00)*      | 0.87 (0.80-0.94)*    |
| UA/NSTEMI only              |                        |                      |
| High vs. low volume         | 1.07 (1.00-1.16)       | 0.97 (0.91-1.05)     |
| Intermediate vs. low volume | 1.08 (1.00-1.17)       | 1.03 (0.95-1.12)     |
| Stable angina only          |                        |                      |
| High vs. low volume         | 0.92 (0.73-1.17)       | 0.92 (0.64-1.05)     |
| Intermediate vs. low volume | 1.00 (0.77-1.29)       | 0.94 (0.72-1.22)     |
| <b>Major bleeding</b>       |                        |                      |
| All patients                |                        |                      |
| High vs. low volume         | 0.95 (0.90-1.01)       | 0.96 (0.91-1.12)     |

|                             |                  |                   |
|-----------------------------|------------------|-------------------|
| Intermediate vs. low volume | 1.01 (0.96-1.08) | 1.00 (0.94-1.06)  |
| STEMI only                  |                  |                   |
| High vs. low volume         | 1.03 (0.93-1.13) | 1.00 (0.91-1.11)  |
| Intermediate vs. low volume | 1.07 (0.97-1.18) | 1.05 (0.95-1.16)  |
| UA/NSTEMI only              |                  |                   |
| High vs. low volume         | 0.94 (0.87-1.01) | 0.90 (0.84-0.97)* |
| Intermediate vs. low volume | 0.94 (0.87-1.01) | 0.92 (0.85-0.99)* |
| Stable angina only          |                  |                   |
| High vs. low volume         | 0.94 (0.80-1.11) | 0.87 (0.74-1.03)  |
| Intermediate vs. low volume | 1.04 (0.88-1.24) | 1.02 (0.86-1.21)  |

\*  $p < 0.05$ . MI, myocardial infarction; OR, hazard ratio; CI, confidence interval; STEMI, ST segment elevation MI; UA, unstable angina; NSTEMI, non-ST segment elevation MI. Low-volume operators performed < 50 PCIs/year; intermediate-volume operators performed 50-100 PCIs/year; high-volume operators performed > 100 PCIs/year



**Supplemental Table 3:** Cumulative incidence of death and MACE over 1-year follow-up by subgroup

|               | Cumulative incidence (95% CI) |                     |                  | Log-rank p-value |
|---------------|-------------------------------|---------------------|------------------|------------------|
|               | Low-volume                    | Intermediate-volume | High-volume      |                  |
| <b>Death</b>  |                               |                     |                  |                  |
| Overall       | 9.5 (9.3-9.7)                 | 9.9 (9.7-10.0)      | 9.8 (9.7-9.9)    | 0.03             |
| STEMI         | 18.9 (18.2-19.7)              | 18.8 (18.4-19.3)    | 18.7 (18.4-19.1) | 0.73             |
| UA/NSTEMI     | 8.7 (8.4-8.9)                 | 9.2 (9.0-9.4)       | 9.5 (9.4-9.6)    | < 0.001          |
| Stable angina | 4.7 (4.4-5.1)                 | 4.5 (4.3-4.7)       | 4.8 (4.6-4.9)    | 0.22             |
| CTO           | 16.0 (14.4-17.6)              | 14.9 (14.0-15.8)    | 12.3 (11.8-12.9) | < 0.001          |
| Bifurcation   | 10.6 (9.8-11.3)               | 10.2 (9.8-10.6)     | 10.7 (10.5-11.0) | 0.21             |
| Left main     | 18.5 (16.3-20.7)              | 19.3 (18.1-20.6)    | 18.3 (17.6-19.0) | 0.13             |
| <b>MACE</b>   |                               |                     |                  |                  |
| Overall       | 15.9 (15.6-16.1)              | 16.2 (16.0-16.3)    | 16.5 (16.4-16.6) | 0.004            |
| STEMI         | 24.7 (23.9-25.6)              | 24.3 (23.9-24.8)    | 24.5 (24.1-24.9) | 0.50             |
| UA/NSTEMI     | 15.9 (15.5-16.3)              | 16.3 (16.1-16.5)    | 16.8 (16.7-17.0) | < 0.001          |
| Stable angina | 10.4 (9.8-10.9)               | 10.0 (9.7-10.3)     | 10.7 (10.5-11.0) | 0.003            |
| CTO           | 22.6 (20.8-24.5)              | 21.4 (20.3-22.5)    | 18.8 (18.1-19.5) | < 0.001          |
| Bifurcation   | 16.4 (15.5-17.3)              | 16.6 (16.1-17.1)    | 17.5 (17.1-17.8) | 0.01             |
| Left main     | 27.3 (24.7-29.9)              | 26.4 (25.1-27.8)    | 26.8 (25.9-27.6) | 0.80             |

CI, confidence interval; STEMI, ST segment elevation MI; UA, unstable angina; NSTEMI, non-ST segment elevation MI; CTO, chronic total occlusion. Low-volume operators performed < 50 PCIs/year;

intermediate-volume operators performed 50-100 PCIs/year; high-volume operators performed > 100 PCIs/year

**Supplemental Table 4: 1-year recurrent MI and unplanned revascularization by operator volume**

|                             | Recurrent MI              |                         | Unplanned revascularization |                         |
|-----------------------------|---------------------------|-------------------------|-----------------------------|-------------------------|
|                             | Unadjusted HR<br>(95% CI) | Adjusted HR<br>(95% CI) | Unadjusted HR<br>(95% CI)   | Adjusted HR<br>(95% CI) |
| Overall                     |                           |                         |                             |                         |
| High vs. low volume         | 1.05 (1.01-1.09)*         | 0.98 (0.95-1.02)        | 1.06 (1.02-1.09)*           | 1.03 (0.99-1.06)        |
| Intermediate vs. low volume | 1.01 (0.97-1.05)          | 0.98 (0.95-1.02)        | 1.01 (0.97-1.04)            | 1.01 (0.97-1.04)        |
| STEMI only                  |                           |                         |                             |                         |
| High vs. low volume         | 0.98 (0.89-1.07)          | 0.96 (0.88-1.05)        | 0.98 (0.91-1.06)            | 0.96 (0.89-1.03)        |
| Intermediate vs. low volume | 0.95 (0.86-1.05)          | 0.95 (0.86-1.04)        | 0.95 (0.88-1.03)            | 0.95 (0.88-1.03)        |
| UA/NSTEMI only              |                           |                         |                             |                         |
| High vs. low volume         | 1.02 (0.97-1.06)          | 0.96 (0.92-1.01)        | 1.03 (0.99-1.07)            | 1.00 (0.97-1.04)        |
| Intermediate vs. low volume | 0.98 (0.94-1.03)          | 0.97 (0.92-1.01)        | 0.99 (0.95-1.03)            | 1.00 (0.96-1.04)        |
| Stable angina only          |                           |                         |                             |                         |
| High vs. low volume         | 1.06 (0.98-1.16)          | 1.02 (0.93-1.11)        | 1.09 (1.01-1.17)*           | 1.06 (0.99-1.14)        |
| Intermediate vs. low volume | 1.06 (0.98-1.17)          | 1.05 (0.95-1.15)        | 1.00 (0.94-1.08)            | 1.01 (0.94-1.08)        |
| Chronic total occlusion     |                           |                         |                             |                         |
| High vs. low volume         | 0.88 (0.73-1.06)          | 0.94 (0.77-1.13)        | 1.01 (0.95-1.18)            | 1.02 (0.86-1.20)        |
| Intermediate vs. low volume | 0.99 (0.81-1.22)          | 1.02 (0.83-1.25)        | 0.96 (0.81-1.14)            | 0.98 (0.82-1.17)        |
| Bifurcation lesion          |                           |                         |                             |                         |
| High vs. low volume         | 1.10 (0.99-1.23)          | 1.03 (0.93-1.14)        | 1.10 (1.01-1.21)*           | 1.07 (0.98-1.16)        |
| Intermediate vs. low volume | 1.04 (0.93-1.17)          | 1.01 (0.91-1.13)        | 1.03 (0.94-1.13)            | 1.04 (0.94-1.13)        |

|                             |                  |                  |                   |                   |
|-----------------------------|------------------|------------------|-------------------|-------------------|
| Left main lesion            |                  |                  |                   |                   |
| High vs. low volume         | 0.91 (0.75-1.10) | 0.89 (0.74-1.08) | 0.87 (0.74-1.03)  | 0.89 (0.75-1.05)  |
| Intermediate vs. low volume | 0.84 (0.68-1.04) | 0.94 (0.68-1.04) | 0.80 (0.66-0.95)* | 0.83 (0.69-0.99)* |

\*  $p < 0.05$ . HR, hazard ratio; MI, myocardial infarction; other abbreviations per Supplemental Table 1.

Low-volume operators performed < 50 PCIs/year; intermediate-volume operators performed 50-100

PCIs/year; high-volume operators performed > 100 PCIs/year

**Supplemental Table 5:** Association between operator volume, analyzed continuously, and 1-year outcomes

|                             | Unadjusted HR (95% CI) | Adjusted HR (95% CI) |
|-----------------------------|------------------------|----------------------|
| All patients                |                        |                      |
| MACE                        | 1.01 (1.00-1.02)       | 1.00 (0.99-1.00)     |
| Post-discharge MACE         | 1.02 (1.01-1.03)*      | 1.01 (1.00-1.01)     |
| Death                       | 1.00 (0.99-1.01)       | 0.99 (0.98-1.00)*    |
| Post-discharge death        | 1.03 (1.02-1.04)*      | 1.00 (0.99-1.01)     |
| MI                          | 1.02 (1.01-1.04)*      | 1.00 (0.99-1.01)     |
| Unplanned revascularization | 1.03 (1.02-1.05)*      | 1.02 (1.01-1.03)*    |
| STEMI                       |                        |                      |
| MACE                        | 1.00 (0.99-1.01)       | 0.99 (0.97-1.00)     |
| Post-discharge MACE         | 1.02 (1.00-1.03)*      | 1.00 (0.99-1.01)     |
| Death                       | 1.00 (0.98-1.02)       | 0.99 (0.97-1.00)     |
| Post-discharge death        | 1.03 (1.00-1.05)*      | 1.01 (0.99-1.03)     |
| MI                          | 1.01 (0.98-1.04)       | 1.00 (0.97-1.02)     |
| Unplanned revascularization | 1.01 (1.00-1.03)       | 1.00 (0.99-1.02)     |
| UA/NSTEMI                   |                        |                      |
| MACE                        | 1.02 (1.01-1.03)*      | 1.00 (0.99-1.01)     |
| Post-discharge MACE         | 1.02 (1.01-1.03)*      | 1.00 (1.00-1.01)     |
| Death                       | 1.02 (1.01-1.04)*      | 0.99 (0.99-1.01)     |
| Post-discharge death        | 1.04 (1.02-1.05)*      | 1.01 (0.99-1.02)     |

|                             |                   |                   |
|-----------------------------|-------------------|-------------------|
| MI                          | 1.02 (1.01-1.03)* | 0.99 (0.98-1.01)  |
| Unplanned revascularization | 1.03 (1.01-1.04)* | 1.01 (1.00-1.03)* |
| Stable angina               |                   |                   |
| MACE                        | 1.03 (1.00-1.05)* | 1.01 (0.99-1.03)  |
| Post-discharge MACE         | 1.03 (1.01-1.04)* | 1.01 (1.00-1.03)  |
| Death                       | 1.01 (0.98-1.04)  | 0.99 (0.96-1.01)  |
| Post-discharge death        | 1.01 (0.98-1.04)  | 0.99 (0.97-1.02)  |
| MI                          | 1.02 (1.00-1.05)  | 1.00 (0.98-1.02)  |
| Unplanned revascularization | 1.05 (1.03-1.08)* | 1.04 (1.02-1.06)* |

\*  $p < 0.05$ ; all abbreviations per Supplemental Tables 1 and 2. HRs represent the change in hazard per 50 unit PCI increase in average annual volume.

**Supplemental Table 6:** Operator volume in 2014 by years of experience

|                                   | <b>Years of experience, 2009-2013</b>       |                                               |                                                  |
|-----------------------------------|---------------------------------------------|-----------------------------------------------|--------------------------------------------------|
| <b>Operator volume, 2014</b>      | <b>0-1 Year<br/>(n = 652<br/>operators)</b> | <b>2-4 years<br/>(n = 1469<br/>operators)</b> | <b>&gt; 4 years<br/>(n = 4403<br/>operators)</b> |
| <b>Low (&lt; 50 PCIs)</b>         | 382 (58.6%)                                 | 480 (32.7%)                                   | 1343 (30.5%)                                     |
| <b>Intermediate (50-100 PCIs)</b> | 172 (26.4%)                                 | 499 (34.0%)                                   | 1491 (33.9%)                                     |
| <b>High (&gt; 100 PCIs)</b>       | 98 (15.0%)                                  | 490 (33.4%)                                   | 1569 (35.6%)                                     |

$p < 0.001$
